# Supplementary material for: A Consequential Life Cycle Assessment of Coconut Shell Ash as a Supplementary Cementitious Material
Source: Research Square preprint supplement (doi:10.21203/rs.3.rs-8427130/v1), 2026-02-05
Supplement: Supplementary file 1 [file 00e31511fb76abf4f604418f.docx]

Supplementary information:

Assessment of mechanical and environmental performance of mortar with Coconut Shell Ashes as Supplementary Cementitious Material

Nicolas Bertoldo1*, Nicola Cefis2, Enrico Paris3, Francesco Gallucci3, Giovanni Dotelli1

1Department of Chemistry, Materials and Chemical Engineering ”Giulio Natta”, Politecnico di Milano, Piazza Leonardo Da Vinci 32, Milan, 20133, Italy.

2Department of Civil and Environmental Engineering, Politecnico di Milano, Piazza Leonardo Da Vinci 32, Milan, 20133, Italy.

3CREA-IT Council for Agricultural Research and Economics, via della Pascolare 16, Monterotondo, 00015, Italy.

*Corresponding author(s). E-mail(s): [nicolas.bertoldo@polimi.it](mailto:nicolas.bertoldo@polimi.it);

Contributing authors: nicola.cefis@polimi.it; [enrico.paris@crea.gov.it](mailto:enrico.paris@crea.gov.it); [francesco.gallucci@crea.gov.it](mailto:francesco.gallucci@crea.gov.it); [giovanni.dotelli@polimi.it](mailto:giovanni.dotelli@polimi.it);


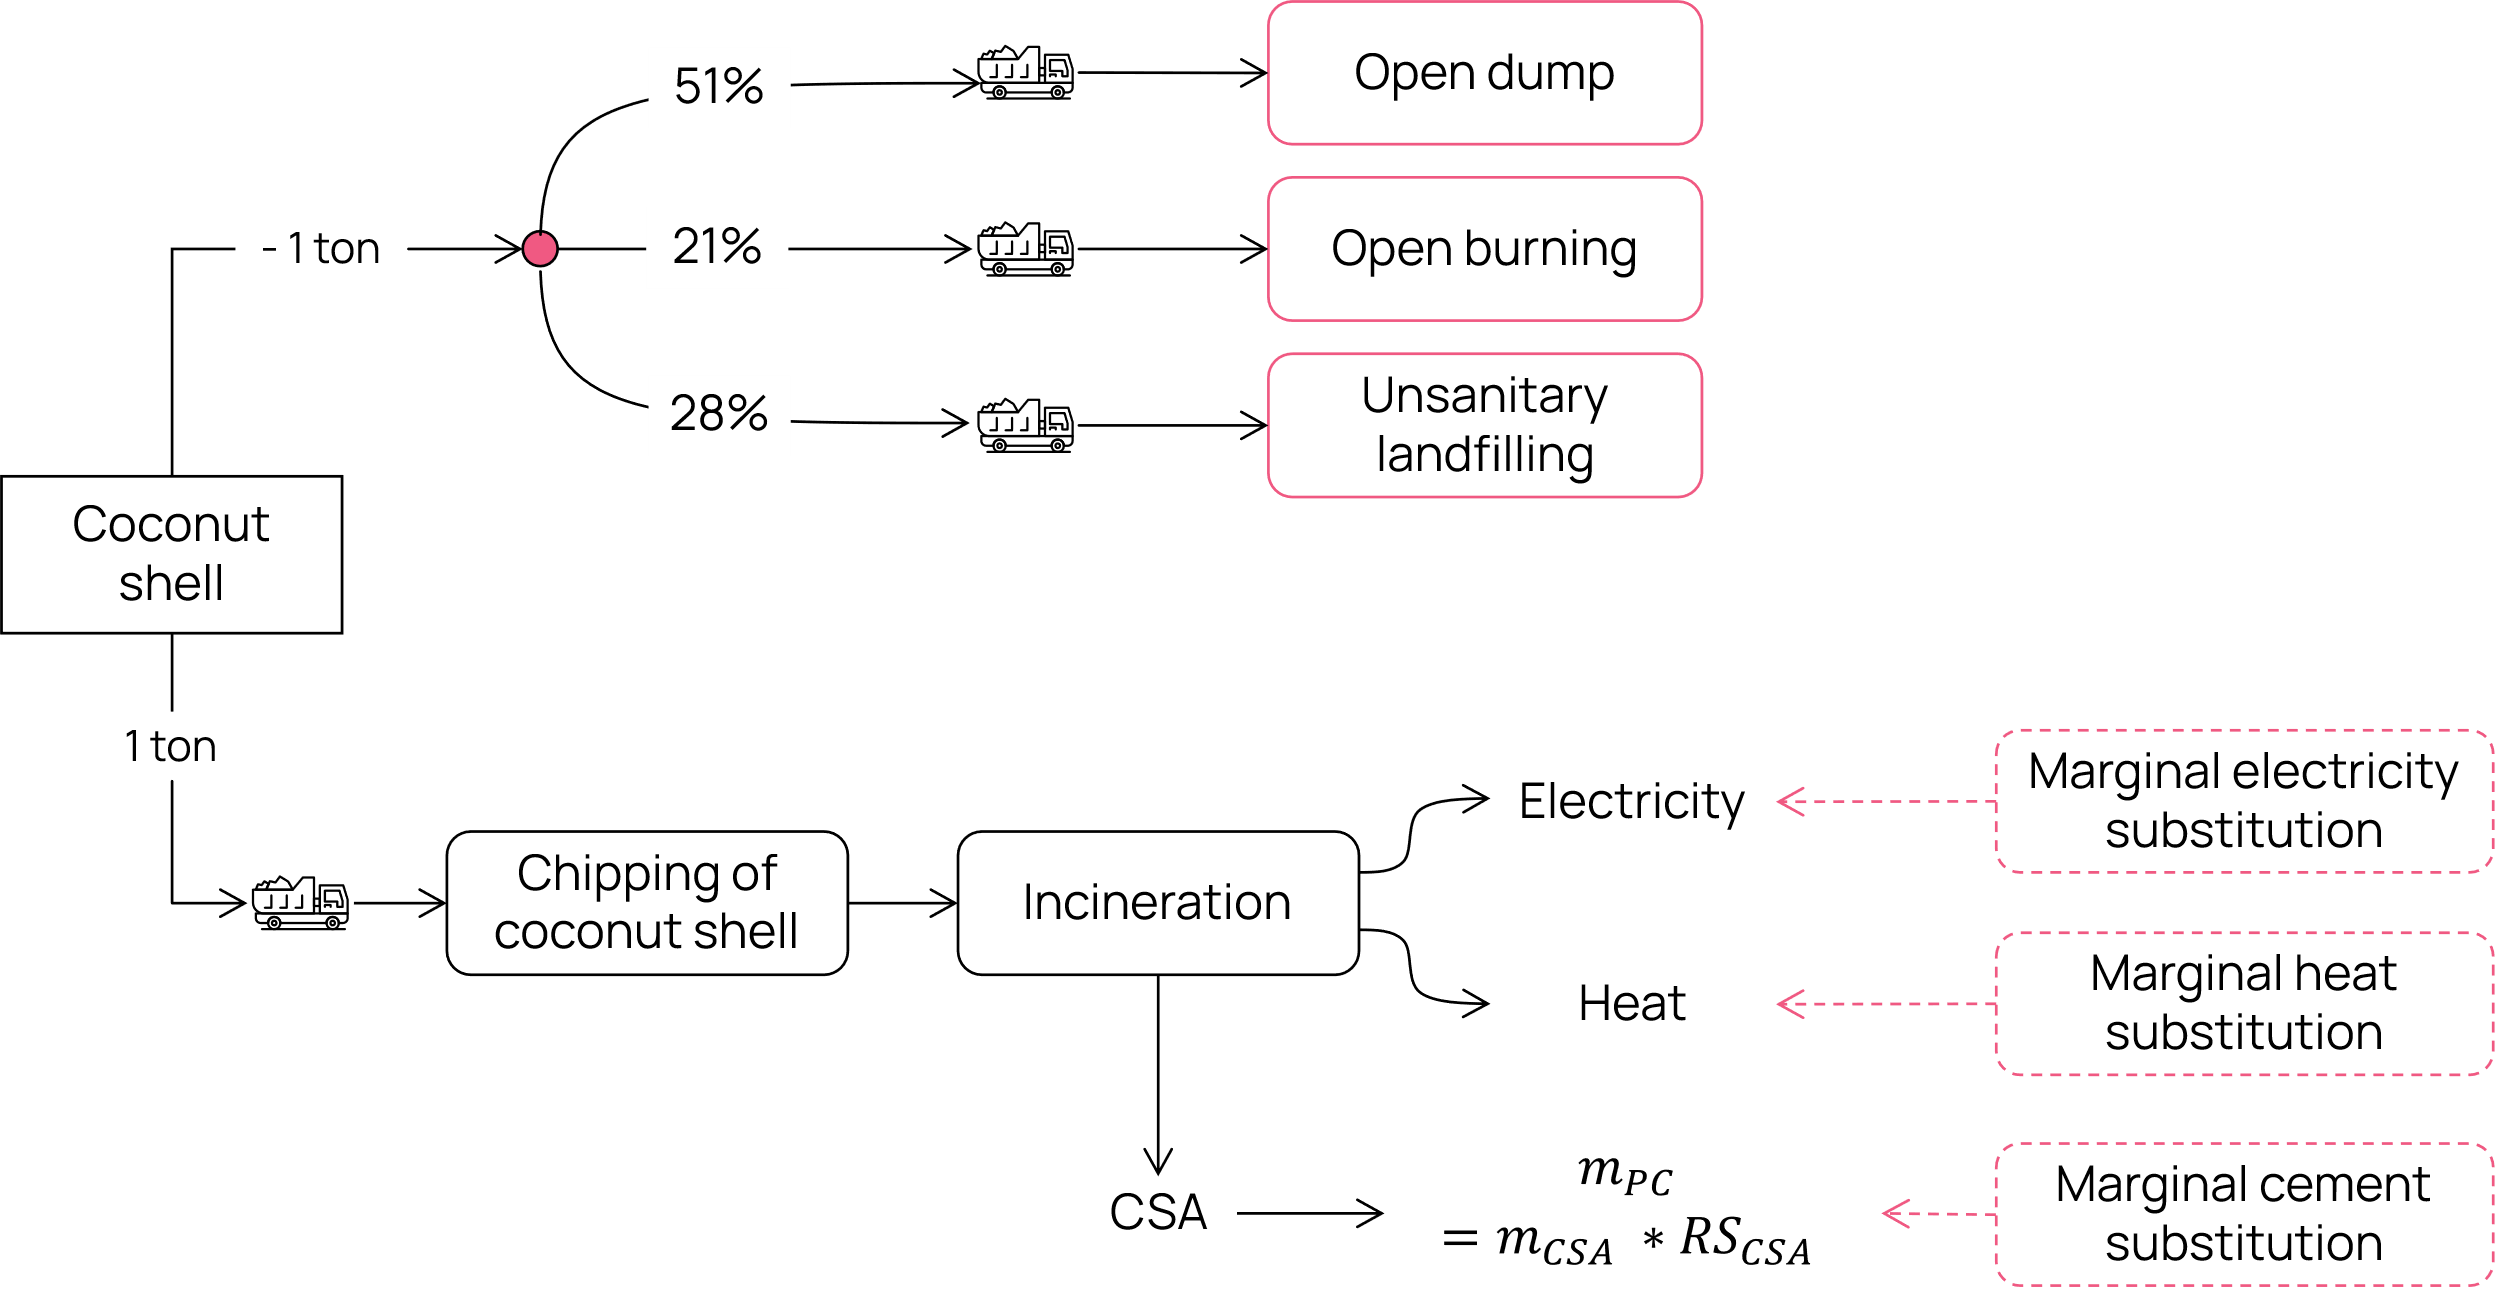


Figure SI : System boundary of the LCA study. The boxes with the continuous red border represent the current waste treatment process, while the boxes with a dashed red border represent avoided processes. mPC = mass of Portland Cement, mCSA = mass of CSA, RSCSA = relative strength of mortar with CSA.

## Mechanical strength results

Table SI : Compressive strength test results (MPa)

| **Hydration time** | **Reference** | **5% CSA** | **10% CSA** |
| --- | --- | --- | --- |
| 7 days | 42.8 | 31.7 | 27.8 |
| 7 days | 42.2 | 31 | 28.4 |
| 7 days | 42.2 | 33.2 | 29.1 |
| 7 days | 41.5 | 31.8 | 28.9 |
| 14 days | 45.3 | 36.3 | 32.3 |
| 14 days | 40.5 | 36 | 34.1 |
| 14 days | 45.7 | 37.3 | 30.6 |
| 14 days | 41.5 | 35.6 | 34.3 |
| 28 days | 46.1 | 38 | 36.7 |
| 28 days | 44.6 | 35.9 | 36.7 |
| 28 days | 45.2 | 35.7 | 35.5 |
| 28 days | 44.5 | 37.6 | 36.7 |

Table SI : Flexural strength test results (MPa)

| **Hydration time** | **Reference** | **5% CSA** | **10% CSA** |
| --- | --- | --- | --- |
| 7 days | 6.6 | 6 | 5.4 |
| 7 days | 6.8 | 6.4 | 5.1 |
| 14 days | 7.8 | 6.3 | 6.8 |
| 14 days | 6.3 | 5.9 | 5.2 |
| 28 days | 7.7 | 6.4 | 5.4 |
| 28 days | 8.5 | 6.3 | 6.2 |

## Life Cycle Inventories

Table SI : Inventory of the current treatment of 1 kg of coconut shell in India

| **Exchange** | **Amount** | **Unit** | **Type** |
| --- | --- | --- | --- |
| Coconut shell waste | -1 | kg | production |
| market for transport, freight, lorry, unspecified | 7.70E-02 | t*km | technosphere |
| treatment of waste wood, untreated, open dump, wet infiltration class (500mm) | -0.505 | kg | technosphere |
| treatment of waste wood, untreated, open burning | -2.84E-01 | kg | technosphere |
| treatment of waste wood, untreated, unsanitary landfill, wet infiltration class (500mm) | -0.211 | kg | technosphere |

Table SI : Inventory of chipping 1kg of coconut shell waste

| **Exchange** | **Amount** | **Unit** | **Type** |
| --- | --- | --- | --- |
| chipping of coconut shell waste | 1 | kg | production |
| market for chipper, stationary, electric - GLO | 5.30E-08 | unit | technosphere |
| market for electricity, medium voltage -IN-Southern grid | 0.02 | kWh | technosphere |
| market for lubricating oil - RoW | 2.04E-06 | kg | technosphere |
| market for steel, low-alloyed, hot rolled - GLO | 4.08E-06 | kg | technosphere |

Table SI : Inventory of the incineration of 1 kg of coconut shell waste

| **Exchange** | **Amount** | **Unit** | **Type** |
| --- | --- | --- | --- |
| coconut shell waste | 1 | kg | production |
| market for transport, freight, lorry, unspecified, 100 km | 0.1 | t*km | technosphere |
| Carbon dioxide, non-fossil | 2.407820147 | kg | biosphere |
| Carbon monoxide, non-fossil | 0.008638069 | kg | biosphere |
| Nitrogen oxides | 0.00399 | kg | biosphere |
| Sulfur dioxide | 0.0000838 | kg | biosphere |
| Particulate Matter, > 10 um | 5.77849E-05 | kg | biosphere |
| Particulate Matter, < 2.5 um | 0.001559666 | kg | biosphere |
| 1,1,2-Trichloroethane | 2.1566E-12 | kg | biosphere |
| Benzene | 8.8725E-12 | kg | biosphere |
| Carbon tetrachloride | 2.38E-14 | kg | biosphere |
| Naphthalene | 3.273E-13 | kg | biosphere |
| Tetrachloroethylene | 5.7E-15 | kg | biosphere |
| Toluene | 3.4148E-11 | kg | biosphere |
| Styrene | 1.828E-13 | kg | biosphere |
| o-Dichlorobenzene | 6.19462E-13 | kg | biosphere |
| Butadiene | 1.31394E-12 | kg | biosphere |
| market for ammonia, anhydrous, liquid | 1.5252E-07 | kg | technosphere |
| market for chemical, organic | 0.00010881 | kg | technosphere |
| market for chlorine, liquid | 6.1008E-06 | kg | technosphere |
| market for dust collector, electrostatic precipitator, for industrial use | 9.68702E-09 | unit | technosphere |
| market for furnace, wood chips, with silo, 5000kW | 9.68702E-09 | unit | technosphere |
| market for heat and power co-generation unit, organic Rankine cycle, 1000kW electrical | 9.68702E-09 | unit | technosphere |
| market for lubricating oil | 0.000061008 | kg | technosphere |
| market for municipal solid waste | -0.000061008 | kg | technosphere |
| market for sodium chloride, powder | 0.00007626 | kg | technosphere |
| market for waste mineral oil | -0.000061008 | kg | technosphere |
| market for wastewater, average | -1.46382E-05 | m3 | technosphere |
| market for water, decarbonised | 0.0146382 | kg | technosphere |

## Life Cycle Impact Assessment

Table SI : LCA results for the assessed impact categories of the EF 3.1. impact assessment method

| **Stage** | **acidification** | **climate change** | **ecotoxicity: freshwater** | **energy resources: non-renewable** | **eutrophication: freshwater** | **eutrophication: marine** | **eutrophication: terrestrial** | **human toxicity: carcinogenic** |
| --- | --- | --- | --- | --- | --- | --- | --- | --- |
| Chipping of coconut shell | 0.000108 | 0.024286 | 0.053526 | 0.286304 | 1.8E-05 | 2.35E-05 | 0.000231 | 3.09E-12 |
| Incineration of coconut shell | 0.003148 | 0.022781 | 0.078416 | 0.294124 | 5.41E-06 | 0.001584 | 0.017337 | 1.01E-11 |
| Marginal cement substitution | -2.7E-05 | -0.00813 | -0.00964 | -0.04466 | -1.6E-06 | -8.4E-06 | -9.4E-05 | -3.1E-12 |
| Marginal electricity substitution | -0.00366 | -0.81532 | -1.70971 | -9.71476 | -0.00061 | -0.00079 | -0.00779 | -8.7E-11 |
| Marginal heat substitution | -0.00936 | -0.94789 | -3.08717 | -5.01235 | -0.00208 | -0.00148 | -0.01289 | -2.9E-10 |
| Transport of coconut shell waste | -5E-05 | -0.0121 | -0.02428 | -0.1706 | -1.2E-06 | -2E-05 | -0.00022 | -3.1E-12 |
| Transport of coconut shell waste to incinerator plant | 6.53E-05 | 0.015715 | 0.03153 | 0.221557 | 1.61E-06 | 2.62E-05 | 0.000286 | 3.98E-12 |
| Treatment of coconut shell, open burning | -0.00044 | -0.05425 | -0.12231 | 0 | -1.5E-06 | -0.00022 | -0.00243 | -2.8E-10 |
| Treatment of coconut shell, open dump | -1.7E-07 | -0.04192 | -0.02269 | 0 | -3.8E-06 | -0.00017 | -4.4E-08 | -1E-13 |
| Treatment of coconut shell, unsanitary landfill | -9E-06 | -0.02587 | -0.01045 | -0.01352 | -1.6E-06 | -7.4E-05 | -4.7E-05 | -1.5E-13 |

| **Stage** | **human toxicity: non-carcinogenic** | **ionising radiation: human health** | **land use** | **material resources: metals/minerals** | **ozone depletion** | **particulate matter formation** | **photochemical oxidant formation: human health** | **water use** |
| --- | --- | --- | --- | --- | --- | --- | --- | --- |
| Chipping of coconut shell | 1.53E-10 | 0.000865 | 0.06312 | 8.04E-09 | 8.24E-11 | 3.62E-10 | 6.28E-05 | 0.003948 |
| Incineration of coconut shell | 1.96E-10 | -0.0001 | 0.206361 | -1.5E-07 | 1.11E-08 | 3.81E-07 | 0.00412 | 0.003082 |
| Marginal cement substitution | -5.1E-11 | -1.5E-05 | -0.04275 | -2.7E-08 | -1.3E-11 | -2.3E-10 | -2.4E-05 | -0.00026 |
| Marginal electricity substitution | -5E-09 | -0.03034 | -2.10893 | -7.4E-07 | -2.4E-09 | -1.1E-08 | -0.0021 | -0.12997 |
| Marginal heat substitution | -1.3E-08 | 0.146761 | -36.1968 | 8.89E-07 | 5.42E-11 | -2.9E-08 | -0.00319 | -0.58459 |
| Transport of coconut shell waste | -1.2E-10 | -4.7E-05 | -0.1316 | -2.3E-08 | -1.7E-10 | -1.1E-09 | -7.7E-05 | -0.00087 |
| Transport of coconut shell waste to incinerator plant | 1.51E-10 | 6.05E-05 | 0.170915 | 3.05E-08 | 2.26E-10 | 1.47E-09 | 0.0001 | 0.001135 |
| Treatment of coconut shell, open burning | -7.7E-09 | 0 | 0 | 0 | 0 | -3E-10 | -0.0012 | -0.00702 |
| Treatment of coconut shell, open dump | -8.4E-11 | 0 | -0.47286 | 0 | 0 | -1.2E-13 | -1.6E-05 | 0 |
| Treatment of coconut shell, unsanitary landfill | -4.9E-11 | -6.9E-08 | -0.10738 | 1.74E-09 | -1.6E-11 | -2.6E-10 | -2.3E-05 | -2.6E-05 |
